# Supplementary material for: Perceived Healthiness of Breakfasts in Women with Overweight or Obesity Match Expert Recommendations
Source: publisher site journal article supplement (doi:10.1515/psych-2018-0003), 2018-09-14
Supplement: Supplementary file 1 [file psych-2018-0003_sm.pdf]

**Supplemental Table 1.** Nutritionists' criteria applied for evaluating the healthiness of breakfasts reported by participants.

| Factor                     | Standard breakfast               | Decreases out of the total score of 10 for each criterion that was not meet |
|----------------------------|----------------------------------|-----------------------------------------------------------------------------|
| <b>Food groups</b>         |                                  |                                                                             |
| Fruit                      | 1-2 portions                     | 0 portions = -0.5; 3-4 portions = -0.5; > 5 portions = -1.0                 |
| Vegetable                  | 1-2 portions                     | 0 portions = -0.5; 3-4 portions = -0.5; > 5 portions = -1.0                 |
| Grain                      | 2-3 portions                     | 0 portions = -0.5; 4-5 portions = -0.5; > 6 portions = -1.0                 |
| Protein                    | 1-2 portions                     | 0 portions = -0.5; 3-4 portions = -0.5; > 5 portions = -1.0                 |
| Dairy                      | 1 portion                        | 0 portions = -0.5; 2-3 portions = -0.5; > 4 portions = -1.0                 |
| Water                      | 1 portion                        | 0 portions = -0.5                                                           |
| Fat                        | 0-1 portion                      | 2-3 portions = -1.0; > 4 portions = -1.5                                    |
| Sugar                      | 0-1 portion                      | 2-3 portions = -0.5; > 4 portions = -1.0                                    |
| <b>Nutritional content</b> |                                  |                                                                             |
| Kilocalories               | 25% of energy needs $\pm 1.5 SD$ | Below or above the 25% of energy needs $\pm 1.5 SD = -1.0$                  |
| Carbohydrate %             | 50-60%                           |                                                                             |
| Protein %                  | 10-20%                           | Below or above energy percent range from macronutrients = -1.0              |
| Lipids %                   | 20-30%                           |                                                                             |

*Notes:* *SD* = Standard deviations of estimated energy requirements of all participants.

**Supplemental Table 2.** Participant characteristics

|                             | Overweight    |               | Obesity       |               | Urban location |               | Semi-urban location |               |
|-----------------------------|---------------|---------------|---------------|---------------|----------------|---------------|---------------------|---------------|
|                             | Healthy       | Unhealthy     | Healthy       | Unhealthy     | Healthy        | Unhealthy     | Healthy             | Unhealthy     |
|                             | breakfast     | breakfast     | breakfast     | breakfast     | breakfast      | breakfast     | breakfast           | breakfast     |
|                             | <i>n</i> = 35 | <i>n</i> = 30 | <i>n</i> = 25 | <i>n</i> = 30 | <i>n</i> = 30  | <i>n</i> = 30 | <i>n</i> = 30       | <i>n</i> = 30 |
| <b>Age in years</b>         | 30.6 ± 5.3    | 31.8 ± 4.1    | 32.9 ± 4.1    | 31.6 ± 4.6    | 30.4 ± 4.5     | 31.0 ± 4.5    | 32.7 ± 5.1          | 32.4 ± 4.1    |
| <b>BMI kg/m<sup>2</sup></b> | 27.4 ± 1.5    | 26.9 ± 1.4    | 33.1 ± 2.8    | 33.4 ± 3.2    | 29.0 ± 2.9     | 29.7 ± 3.4    | 30.5 ± 4.0          | 30.8 ± 4.6    |
| <b>Education, %</b>         |               |               |               |               |                |               |                     |               |
| Basic                       | 45.7          | 53.3          | 56.0          | 66.7          | 33.3           | 33.3          | 66.7                | 86.7          |
| High school                 | 37.1          | 26.7          | 16.0          | 13.3          | 40.0           | 30.0          | 16.7                | 10.0          |
| College/University          | 17.1          | 20.0          | 28.0          | 20.0          | 26.7           | 36.7          | 16.7                | 3.3           |
| <b>Occupation, %</b>        |               |               |               |               |                |               |                     |               |
| Home                        | 51.4          | 70.0          | 56.0          | 60.0          | 53.3           | 66.7          | 53.3                | 63.3          |
| Employee                    | 48.6          | 30.0          | 44.0          | 30.0          | 46.7           | 33.3          | 46.7                | 36.7          |
| <b>Have children, %</b>     | 74.3          | 83.3          | 84.0          | 96.7          | 76.7           | 76.7          | 80.0                | 93.3          |

*Notes:* Continuous variables: mean ± standard deviation. Categorical variables: percent (%) of total participants in the condition

**Supplemental Table 3.** Characteristics of reported healthy (HB) and unhealthy (UB) breakfasts.

|                                   | Overweight          |                     | Obesity             |                     | Urban location      |                     | Semi-urban location |                     |
|-----------------------------------|---------------------|---------------------|---------------------|---------------------|---------------------|---------------------|---------------------|---------------------|
|                                   | HB<br><i>n</i> = 35 | UB<br><i>n</i> = 30 | HB<br><i>n</i> = 25 | UB<br><i>n</i> = 30 | HB<br><i>n</i> = 30 | UB<br><i>n</i> = 30 | HB<br><i>n</i> = 30 | UB<br><i>n</i> = 30 |
| <b>Episode recency, days back</b> | 2.5 ± 2.4           | 2.6 ± 2.1           | 3.1 ± 2.2           | 3.0 ± 1.8           | 2.9 ± 2.6           | 3.1 ± 2.1           | 2.6 ± 2.0           | 2.8 ± 2.1           |
| <b>Place of the episode, %</b>    |                     |                     |                     |                     |                     |                     |                     |                     |
| Home                              | 91.0                | 47.0                | 88.0                | 50.0                | 90.0                | 46.7                | 90.0                | 50.0                |
| Out of home                       | 9.0                 | 53.0                | 12.0                | 50.0                | 10.0                | 53.3                | 10.0                | 50.0                |
| <b>Number of people present</b>   | 2.4 ± 1.9           | 2.4 ± 2.2           | 2.8 ± 1.4           | 3.0 ± 2.8           | 1.9 ± 1.7           | 2.7 ± 2.6           | 3.3 ± 1.5           | 2.7 ± 2.5           |
| <b>Relationship, %</b>            |                     |                     |                     |                     |                     |                     |                     |                     |
| Alone                             | 28.6                | 30.0                | 8.0                 | 16.7                | 33.3                | 26.7                | 3.3                 | 20.0                |
| Family                            | 62.9                | 60.0                | 80.0                | 70.0                | 60.0                | 53.3                | 80.0                | 76.7                |
| Acquaintances                     | 8.6                 | 10.0                | 12.0                | 13.3                | 6.7                 | 20.0                | 13.3                | 3.3                 |
| <b>Food portions reported</b>     |                     |                     |                     |                     |                     |                     |                     |                     |
| Fruit                             | 1.9 ± 1.5           | 0.5 ± 1.5           | 1.2 ± 1.4           | 0.1 ± 0.4           | 2.1 ± 1.7           | 0.2 ± 1.5           | 1.2 ± 1.1           | 0.4 ± 1.5           |
| Vegetables                        | 0.4 ± 0.6           | 0.0 ± 0.2           | 0.3 ± 0.6           | 0.1 ± 0.3           | 0.4 ± 0.6           | 0.0 ± 0.2           | 0.3 ± 0.6           | 0.1 ± 0.3           |
| Grains                            | 1.6 ± 2.0           | 3.9 ± 2.6           | 1.9 ± 1.7           | 4.5 ± 3.1           | 1.7 ± 1.9           | 4.7 ± 3.4           | 1.7 ± 1.9           | 3.7 ± 2.1           |
| Higher protein foods              | 1.0 ± 1.1           | 1.5 ± 1.7           | 1.2 ± 1.2           | 1.0 ± 1.3           | 1.0 ± 1.0           | 1.5 ± 1.7           | 1.1 ± 1.3           | 1.0 ± 1.2           |
| Dairy                             | 0.6 ± 0.6           | 0.3 ± 0.5           | 0.5 ± 0.9           | 0.2 ± 0.5           | 0.6 ± 0.9           | 0.3 ± 0.6           | 0.5 ± 0.6           | 0.2 ± 0.4           |
| Water                             | 0.2 ± 0.4           | 0.3 ± 0.5           | 0.6 ± 0.6           | 0.4 ± 0.4           | 0.3 ± 0.5           | 0.3 ± 0.5           | 0.5 ± 0.6           | 0.4 ± 0.5           |
| Sugar                             | 0.4 ± 0.7           | 2.1 ± 2.5           | 0.8 ± 0.8           | 2.3 ± 2.1           | 0.4 ± 0.7           | 1.8 ± 1.9           | 0.8 ± 0.8           | 2.6 ± 2.6           |
| Fat                               | 0.3 ± 0.5           | 2.4 ± 2.6           | 0.5 ± 0.8           | 3.0 ± 2.9           | 0.3 ± 0.5           | 3.6 ± 3.4           | 0.5 ± 0.8           | 1.9 ± 1.6           |
| <b>Nutritional content</b>        |                     |                     |                     |                     |                     |                     |                     |                     |
| Kilocalories                      | 368.8 ± 203.5       | 595.7 ± 340.9       | 378.7 ± 194.8       | 620.8 ± 346.6       | 397.0 ± 188.5       | 678.0 ± 414.2       | 349.0 ± 208.2       | 537.8 ± 234.3       |
| Carbohydrate %                    | 71.2 ± 20.6         | 63.2 ± 13.9         | 69.9 ± 18.8         | 64.8 ± 16.5         | 73.5 ± 15.5         | 59.6 ± 14.1         | 67.9 ± 23.1         | 68.4 ± 15.0         |
| Protein %                         | 16.5 ± 11.1         | 14.5 ± 7.5          | 15.8 ± 10.1         | 11.1 ± 6.1          | 15.4 ± 8.8          | 13.0 ± 6.4          | 17.1 ± 12.3         | 12.6 ± 7.7          |
| Lipids %                          | 12.3 ± 10.3         | 22.3 ± 11.1         | 14.2 ± 10.6         | 24.1 ± 12.5         | 11.2 ± 7.8          | 27.4 ± 11.0         | 15.0 ± 12.3         | 19.0 ± 11.0         |

*Notes:* Continuous variables: mean ± standard deviation. Categorical variables: percent (%) of total participants in the condition.

Supplemental Table 3. Continued.

|                                   | Weight status effect |          |          | Location effect |          |          | HB vs. UB effect |          |          |
|-----------------------------------|----------------------|----------|----------|-----------------|----------|----------|------------------|----------|----------|
|                                   | <i>size</i>          | <i>F</i> | <i>p</i> | <i>size</i>     | <i>F</i> | <i>p</i> | <i>size</i>      | <i>F</i> | <i>p</i> |
| <b>Episode recency, days back</b> | .016                 | 1.91     | .17      | .017            | 1.84     | .17      | .000             | 0.00     | .96      |
| <b>Place of the episode, %</b>    |                      |          |          |                 |          |          |                  |          |          |
| Home                              | .000                 | 0.00     | .99      | .001            | 0.08     | .77      | .191             | 26.50    | .001     |
| Out of home                       |                      |          |          |                 |          |          |                  |          |          |
| <b>Number of people present</b>   | .003                 | 0.38     | .54      | .026            | 2.93     | .09      | .000             | 0.03     | .86      |
| <b>Relationship, %</b>            | .024                 | 2.79     | .10      | .043            | 5.04     | .03      | .005             | 0.57     | .45      |
| Alone                             |                      |          |          |                 |          |          |                  |          |          |
| Family                            |                      |          |          |                 |          |          |                  |          |          |
| Acquaintances                     |                      |          |          |                 |          |          |                  |          |          |
| <b>Food portions reported</b>     |                      |          |          |                 |          |          |                  |          |          |
| Fruit                             | .028                 | 3.25     | .07      | .006            | 0.72     | .40      | .174             | 23.58    | .001     |
| Vegetables                        | .000                 | 0.01     | .94      | .000            | 0.02     | .89      | .091             | 11.17    | .001     |
| Grains                            | .010                 | 1.08     | .30      | .016            | 1.77     | .19      | .214             | 30.47    | .001     |
| Higher protein foods              | .002                 | 0.25     | .62      | .170            | 1.99     | .16      | .001             | 0.10     | .75      |
| Dairy                             | .001                 | 0.08     | .78      | .014            | 1.64     | .20      | .089             | 10.91    | .001     |
| Water                             | .074                 | 8.92     | .003     | .012            | 1.36     | .25      | .003             | 0.34     | .56      |
| Sugar                             | .008                 | 8.90     | .35      | .018            | 2.06     | .15      | .164             | 22.02    | .001     |
| Fat                               | .007                 | 0.82     | .37      | .036            | 4.18     | .04      | .263             | 39.92    | .001     |
| <b>Nutritional content</b>        |                      |          |          |                 |          |          |                  |          |          |
| Kilocalories                      | .002                 | 0.20     | .65      | .032            | 3.73     | .06      | .139             | 18.13    | .001     |
| Carbohydrate %                    | .000                 | 0.03     | .87      | .008            | 0.91     | .34      | .016             | 1.83     | .18      |
| Protein %                         | .012                 | 1.37     | .25      | .000            | 0.01     | .94      | .067             | 8.07     | .005     |
| Lipids %                          | .004                 | 0.47     | .50      | .019            | 2.11     | .15      | .151             | 19.95    | .001     |

Notes: Continuous variables: mean  $\pm$  standard deviation. Categorical variables: percent (%) of total participants in the condition. Effect size: partial eta squared. *p*: probability value – adjusted for 16 comparisons from 0.05 to 0.003.

**Supplemental Table 4.** Counts of reported beliefs about why breakfasts were healthy (HB) or unhealthy (UB) (%).

| Categories                      | Overweight          |                     | Obesity             |                     | Weight status effect |                | Urban location      |                     | Semi-urban location |                     | Location effect |                |
|---------------------------------|---------------------|---------------------|---------------------|---------------------|----------------------|----------------|---------------------|---------------------|---------------------|---------------------|-----------------|----------------|
|                                 | HB<br><i>n</i> = 35 | UB<br><i>n</i> = 30 | UB<br><i>n</i> = 25 | HB<br><i>n</i> = 30 | <i>Size</i>          | <i>Exact p</i> | HB<br><i>n</i> = 30 | UB<br><i>n</i> = 30 | UB<br><i>n</i> = 30 | HB<br><i>n</i> = 30 | <i>Size</i>     | <i>Exact p</i> |
| <i>It had fruit</i>             | 51.4                | 0.0                 | 44.0                | 0.0                 | .055                 | .690           | 43.3                | 0.0                 | 53.3                | 0.0                 | .182            | .072           |
| <i>It had no fruit</i>          | 0.0                 | 10.0                | 0.0                 | 13.3                |                      |                | 0.0                 | 0.0                 | 0.0                 | 23.3                |                 |                |
| <i>It had vegetables</i>        | 22.9                | 0.0                 | 16.0                | 0.0                 | .126                 | .254           | 20.0                | 0.0                 | 20.0                | 0.0                 | .052            | .777           |
| <i>It had no vegetables</i>     | 0.0                 | 6.7                 | 0.0                 | 0.0                 |                      |                | 0.0                 | 0.0                 | 0.0                 | 6.7                 |                 |                |
| <i>It had grains</i>            | 28.6                | 0.0                 | 8.0                 | 0.0                 | .247                 | .011           | 23.3                | 0.0                 | 16.7                | 0.0                 | .025            | 1.00           |
| <i>It had no grains</i>         | 0.0                 | 10.0                | 0.0                 | 0.0                 |                      |                | 0.0                 | 0.0                 | 0.0                 | 10.0                |                 |                |
| <i>It had protein</i>           | 17.1                | 0.0                 | 16.0                | 0.0                 | .060                 | .546           | 20.0                | 0.0                 | 13.3                | 0.0                 | .029            | 1.00           |
| <i>It had no protein</i>        | 0.0                 | 3.3                 | 0.0                 | 0.0                 |                      |                | 0.0                 | 0.0                 | 0.0                 | 3.3                 |                 |                |
| <i>It had dairy</i>             | 20.0                | 0.0                 | 12.0                | 0.0                 | .052                 | .770           | 26.7                | 0.0                 | 6.7                 | 0.0                 | .080            | .558           |
| <i>It had no dairy</i>          | 0.0                 | 3.3                 | 0.0                 | 6.7                 |                      |                | 0.0                 | 0.0                 | 0.0                 | 10.0                |                 |                |
| <i>It had water</i>             | 2.9                 | 0.0                 | 0.0                 | 0.0                 | .084                 | 1.000          | 3.3                 | 0.0                 | 0.0                 | 0.0                 | .092            | 1.00           |
| <i>It had no water</i>          | 0.0                 | 0.0                 | 0.0                 | 0.0                 |                      |                | 0.0                 | 0.0                 | 0.0                 | 0.0                 |                 |                |
| <i>It had no sugar</i>          | 0.0                 | 0.0                 | 0.0                 | 0.0                 | .110                 | .253           | 0.0                 | 0.0                 | 0.0                 | 0.0                 | .188            | .075           |
| <i>It had sugar</i>             | 0.0                 | 16.7                | 0.0                 | 26.7                |                      |                | 0.0                 | 10.0                | 0.0                 | 33.3                |                 |                |
| <i>It had no fat</i>            | 11.4                | 0.0                 | 12.0                | 0.0                 | .046                 | .679           | 13.3                | 0.0                 | 10.0                | 0.0                 | .019            | 1.00           |
| <i>It had fat</i>               | 0.0                 | 46.7                | 0.0                 | 33.3                |                      |                | 0.0                 | 40.0                | 0.0                 | 40.0                |                 |                |
| <i>It had no refined grains</i> | 0.0                 | 0.0                 | 0.0                 | 0.0                 | .207                 | .042           | 0.0                 | 0.0                 | 0.0                 | 0.0                 | .060            | .743           |
| <i>It had refined grains</i>    | 0.0                 | 6.7                 | 0.0                 | 26.7                |                      |                | 0.0                 | 13.3                | 0.0                 | 20.0                |                 |                |
| <i>It was natural</i>           | 22.9                | 0.0                 | 12.0                | 0.0                 | .086                 | .435           | 20.0                | 0.0                 | 16.7                | 0.0                 | .072            | .602           |
| <i>It was not natural</i>       | 0.0                 | 10.0                | 0.0                 | 10.0                |                      |                | 0.0                 | 13.3                | 0.0                 | 6.7                 |                 |                |
| <i>It had nutrients</i>         | 17.1                | 0.0                 | 4.0                 | 0.0                 | .090                 | .354           | 20.0                | 0.0                 | 3.3                 | 0.0                 | .172            | .097           |
| <i>It had no nutrients</i>      | 0.0                 | 26.7                | 0.0                 | 23.3                |                      |                | 0.0                 | 30.0                | 0.0                 | 20.0                |                 |                |
| <i>It was balanced</i>          | 14.3                | 0.0                 | 48.0                | 0.0                 | .202                 | .035           | 33.3                | 0.0                 | 23.3                | 0.0                 | .175            | .084           |
| <i>It is unbalanced</i>         | 0.0                 | 40.0                | 0.0                 | 43.3                |                      |                | 0.0                 | 53.3                | 0.0                 | 30.0                |                 |                |

Notes: % = percent of total participants in the condition. *p*: exact probability value – adjusted for 12 comparisons from 0.05 to 0.004.

**Supplemental Table 5.** Associations between participants and nutritionists in rated healthiness of reported breakfasts.

|                                  | Breakfast healthiness |                                       |          |                                      | <i>r</i> HB vs. <i>r</i> UB |          |          |          |          |          |
|----------------------------------|-----------------------|---------------------------------------|----------|--------------------------------------|-----------------------------|----------|----------|----------|----------|----------|
|                                  | <i>k</i>              | Nutritionists<br><i>M</i> ± <i>SD</i> | <i>n</i> | Participants<br><i>M</i> ± <i>SD</i> | <i>t</i>                    | <i>p</i> | <i>r</i> | <i>p</i> | <i>z</i> | <i>p</i> |
| Overweight                       |                       |                                       |          |                                      |                             |          |          |          |          |          |
| Healthy breakfasts               | 35                    | 6.5 ± 1.0                             | 35       | 8.1 ± 1.4                            | -5.86                       | .001     | -0.06    | .72      | -0.23    | .81      |
| Unhealthy breakfasts             | 30                    | 4.5 ± 1.4                             | 30       | 3.2 ± 2.3                            | 2.73                        | .01      | 0.001    | 1.00     |          |          |
| Healthy and unhealthy breakfasts | 65                    | 5.6 ± 1.5                             | 65       | 5.9 ± 3.1                            | -0.92                       | .36      | 0.52     | .001     |          |          |
| Obesity                          |                       |                                       |          |                                      |                             |          |          |          |          |          |
| Healthy breakfasts               | 25                    | 5.9 ± 0.7                             | 25       | 7.9 ± 1.7                            | -5.49                       | .001     | -0.03    | .90      | -1.11    | .27      |
| Unhealthy breakfasts             | 30                    | 4.5 ± 1.2                             | 30       | 3.0 ± 2.7                            | 3.23                        | .003     | 0.28     | .14      |          |          |
| Healthy and unhealthy breakfasts | 55                    | 5.5 ± 1.3                             | 55       | 5.6 ± 3.2                            | -0.21                       | .84      | 0.53     | .001     |          |          |
| Urban locality                   |                       |                                       |          |                                      |                             |          |          |          |          |          |
| Healthy breakfasts               | 30                    | 6.3 ± 1.0                             | 30       | 8.1 ± 1.3                            | -5.35                       | .0001    | -0.18    | .34      | -1.38    | .17      |
| Unhealthy breakfasts             | 30                    | 4.2 ± 1.2                             | 30       | 3.0 ± 2.6                            | 2.42                        | .02      | 0.16     | .39      |          |          |
| Healthy and unhealthy breakfasts | 60                    | 5.3 ± 1.5                             | 60       | 5.5 ± 3.2                            | -0.79                       | .43      | 0.58     | .0001    |          |          |
| Semi-urban locality              |                       |                                       |          |                                      |                             |          |          |          |          |          |
| Healthy breakfasts               | 30                    | 6.1 ± 0.8                             | 30       | 8.0 ± 1.7                            | -5.97                       | .0001    | 0.12     | .52      | -0.22    | .82      |
| Unhealthy breakfasts             | 30                    | 4.8 ± 1.3                             | 30       | 3.1 ± 2.4                            | 3.58                        | .001     | 0.11     | .56      |          |          |
| Healthy and unhealthy breakfasts | 60                    | 5.5 ± 1.3                             | 60       | 5.6 ± 3.2                            | -0.34                       | .74      | 0.46     | .0001    |          |          |

Notes: *k* = number of breakfasts evaluated by nutritionists. *M* ± *SD* = mean ± standard deviation. HB = Healthy breakfasts. UB = Unhealthy breakfasts. *t* = *t* test. *r* = correlation coefficient. *p* = probability value.
